# Supplementary material for: Multiscale 3D phenotyping of human cerebral organoids
Source: PubMed Central journal article supplement (PMC7723053; doi:10.1038/s41598-020-78130-7), 2020-12-08
Supplement: 41598_2020_78130_MOESM2_ESM.pdf [file 41598_2020_78130_MOESM2_ESM.pdf]

Supplementary Table 1: List of antibodies used in this study

| <b>Antigen</b>               | <b>conjugated fluorophore</b> | <b>Catalog #</b> | <b>Vendor</b>               | <b>Host</b> | <b>Clonality</b> | <b>Clone</b> |
|------------------------------|-------------------------------|------------------|-----------------------------|-------------|------------------|--------------|
| TUBB3                        | Alexa Fluor 594               | 657408           | Biologend                   | ms          | M                | AA10         |
| MAP2                         | Alexa Fluor 594               | 801803           | Biologend                   | ms          | M                | SMI 52       |
| TBR1                         | Alexa Fluor 647               | 45664S           | Cell Signaling Technologies | rb          | M                | D6C6X        |
| VIMENTIN                     | Alexa Fluor 647               | 9856S            | Cell Signaling Technologies | rb          | M                | D21H3        |
| SOX2                         | none                          | AF2018           | R&D Systems                 | gt          | P                |              |
| OTX2                         | none                          | AF1979           | R&D                         | gt          | P                |              |
| REELIN                       | none                          | MAB5366          | Millipore                   | ms          | M                | 142          |
| NESTIN                       | none                          | MAB5326          | Millipore                   | ms          | M                | 10C2         |
| N-CAD (N-Cadherin)           | none                          | 610920           | BD Bio                      | ms          | M                | 32           |
| BLP                          | none                          | ABN14            | Millipore                   | rb          | P                |              |
| FOXP1                        | none                          | ab196868         | Abcam                       | rb          | M                | EPR18987     |
| NKX2.1                       | none                          | ab76013          | Abcam                       | rb          |                  |              |
| TTR                          | none                          | AHP1837          | Biorad                      | sh          | P                |              |
| PAX6                         | none                          | AF8150           | R&D                         | sh          | P                |              |
| CTIP2                        | none                          | ab18465          | Abcam                       | rt          | M                | 25B6         |
| Zika virus Envelope          | none                          | GTX133314        | GeneTex                     | rb          | P                |              |
| cleaved Caspase-3 (Asp179)   | none                          | 9579S            | Cell Signaling Technologies | rb          | M                | D3E9         |
| anti-goat IgG (Fab fragment) | Alexa Fluor 594               | 805-587-008      | Jackson ImmunoResearch      | bo          | P                |              |
