# Supplementary material for: Multiscale 3D phenotyping of human cerebral organoids
Source: PubMed Central journal article supplement (PMC7723053; doi:10.1038/s41598-020-78130-7), 2020-12-08
Supplement: 41598_2020_78130_MOESM3_ESM.pdf [file 41598_2020_78130_MOESM3_ESM.pdf]

Supplementary Table 2: List of the computed features used for inter-scale and comparative analyses

| Feature                          | Scale       |
|----------------------------------|-------------|
| DN nbrhd, sox2 count             | Single-cell |
| DN nbrhd, tbr1 count             | Single-cell |
| DN nbrhd, dn count               | Single-cell |
| SOX2 nbrhd, sox2 count           | Single-cell |
| SOX2 nbrhd, tbr1 count           | Single-cell |
| SOX2 nbrhd, dn count             | Single-cell |
| TBR1 nbrhd, sox2 count           | Single-cell |
| TBR1 nbrhd, tbr1 count           | Single-cell |
| TBR1 nbrhd, dn count             | Single-cell |
| DP nbrhd, sox2 count             | Single-cell |
| DP nbrhd, tbr1 count             | Single-cell |
| DP nbrhd, dn count               | Single-cell |
| MidTBR1 nbrhd, sox2 count        | Single-cell |
| MidTBR1 nbrhd, tbr1 count        | Single-cell |
| MidTBR1 nbrhd, dn count          | Single-cell |
| MidSOX2 nbrhd, sox2 count        | Single-cell |
| MidSOX2 nbrhd, tbr1 count        | Single-cell |
| MidSOX2 nbrhd, dn count          | Single-cell |
| MidInter nbrhd, sox2 count       | Single-cell |
| MidInter nbrhd, tbr1 count       | Single-cell |
| MidInter nbrhd, dn count         | Single-cell |
| DN nbrhd fraction                | Single-cell |
| SOX2 nbrhd fraction              | Single-cell |
| TBR1 nbrhd fraction              | Single-cell |
| DP nbrhd fraction                | Single-cell |
| MidTBR1 nbrhd fraction           | Single-cell |
| MidSOX2 nbrhd fraction           | Single-cell |
| MidInter nbrhd fraction          | Single-cell |
| TBR1 / SOX2 ratio                | Single-cell |
| MidTBR1 / MidSOX2 ratio          | Single-cell |
| MidInter / DN ratio              | Single-cell |
| DN nbrhd, eq diam mean           | Single-cell |
| DN nbrhd, eq diam stdev          | Single-cell |
| SOX2 nbrhd, eq diam mean         | Single-cell |
| SOX2 nbrhd, eq diam stdev        | Single-cell |
| TBR1 nbrhd, eq diam mean         | Single-cell |
| TBR1 nbrhd, eq diam stdev        | Single-cell |
| DP nbrhd, eq diam mean           | Single-cell |
| DP nbrhd, eq diam stdev          | Single-cell |
| MidTBR1 nbrhd, eq diam mean      | Single-cell |
| MidTBR1 nbrhd, eq diam stdev     | Single-cell |
| MidSOX2 nbrhd, eq diam mean      | Single-cell |
| MidSOX2 nbrhd, eq diam stdev     | Single-cell |
| MidInter nbrhd, eq diam mean     | Single-cell |
| MidInter nbrhd, eq diam stdev    | Single-cell |
| DN nbrhd, major axis mean        | Single-cell |
| DN nbrhd, major axis stdev       | Single-cell |
| SOX2 nbrhd, major axis mean      | Single-cell |
| SOX2 nbrhd, major axis stdev     | Single-cell |
| TBR1 nbrhd, major axis mean      | Single-cell |
| TBR1 nbrhd, major axis stdev     | Single-cell |
| DP nbrhd, major axis mean        | Single-cell |
| DP nbrhd, major axis stdev       | Single-cell |
| MidTBR1 nbrhd, major axis mean   | Single-cell |
| MidTBR1 nbrhd, major axis stdev  | Single-cell |
| MidSOX2 nbrhd, major axis mean   | Single-cell |
| MidSOX2 nbrhd, major axis stdev  | Single-cell |
| MidInter nbrhd, major axis mean  | Single-cell |
| MidInter nbrhd, major axis stdev | Single-cell |
| DN nbrhd, axis ratio mean        | Single-cell |
| DN nbrhd, axis ratio stdev       | Single-cell |
| SOX2 nbrhd, axis ratio mean      | Single-cell |
| SOX2 nbrhd, axis ratio stdev     | Single-cell |

|                                             |             |
|---------------------------------------------|-------------|
| TBR1 nbrhd, axis ratio mean                 | Single-cell |
| TBR1 nbrhd, axis ratio stdev                | Single-cell |
| DP nbrhd, axis ratio mean                   | Single-cell |
| DP nbrhd, axis ratio stdev                  | Single-cell |
| MidTBR1 nbrhd, axis ratio mean              | Single-cell |
| MidTBR1 nbrhd, axis ratio stdev             | Single-cell |
| MidSOX2 nbrhd, axis ratio mean              | Single-cell |
| MidSOX2 nbrhd, axis ratio stdev             | Single-cell |
| MidInter nbrhd, axis ratio mean             | Single-cell |
| MidInter nbrhd, axis ratio stdev            | Single-cell |
| DN nbrhd, sox2 proximity to SOX2 mean       | Single-cell |
| DN nbrhd, sox2 proximity to SOX2 stdev      | Single-cell |
| DN nbrhd, sox2 proximity to TBR1 mean       | Single-cell |
| DN nbrhd, sox2 proximity to TBR1 stdev      | Single-cell |
| DN nbrhd, tbr1 proximity to SOX2 mean       | Single-cell |
| DN nbrhd, tbr1 proximity to SOX2 stdev      | Single-cell |
| DN nbrhd, tbr1 proximity to TBR1 mean       | Single-cell |
| DN nbrhd, tbr1 proximity to TBR1 stdev      | Single-cell |
| DN nbrhd, dn proximity to SOX2 mean         | Single-cell |
| DN nbrhd, dn proximity to SOX2 stdev        | Single-cell |
| DN nbrhd, dn proximity to TBR1 mean         | Single-cell |
| DN nbrhd, dn proximity to TBR1 stdev        | Single-cell |
| SOX2 nbrhd, sox2 proximity to SOX2 mean     | Single-cell |
| SOX2 nbrhd, sox2 proximity to SOX2 stdev    | Single-cell |
| SOX2 nbrhd, sox2 proximity to TBR1 mean     | Single-cell |
| SOX2 nbrhd, sox2 proximity to TBR1 stdev    | Single-cell |
| SOX2 nbrhd, tbr1 proximity to SOX2 mean     | Single-cell |
| SOX2 nbrhd, tbr1 proximity to SOX2 stdev    | Single-cell |
| SOX2 nbrhd, tbr1 proximity to TBR1 mean     | Single-cell |
| SOX2 nbrhd, tbr1 proximity to TBR1 stdev    | Single-cell |
| SOX2 nbrhd, dn proximity to SOX2 mean       | Single-cell |
| SOX2 nbrhd, dn proximity to SOX2 stdev      | Single-cell |
| SOX2 nbrhd, dn proximity to TBR1 mean       | Single-cell |
| SOX2 nbrhd, dn proximity to TBR1 stdev      | Single-cell |
| TBR1 nbrhd, sox2 proximity to SOX2 mean     | Single-cell |
| TBR1 nbrhd, sox2 proximity to SOX2 stdev    | Single-cell |
| TBR1 nbrhd, sox2 proximity to TBR1 mean     | Single-cell |
| TBR1 nbrhd, sox2 proximity to TBR1 stdev    | Single-cell |
| TBR1 nbrhd, tbr1 proximity to SOX2 mean     | Single-cell |
| TBR1 nbrhd, tbr1 proximity to SOX2 stdev    | Single-cell |
| TBR1 nbrhd, tbr1 proximity to TBR1 mean     | Single-cell |
| TBR1 nbrhd, tbr1 proximity to TBR1 stdev    | Single-cell |
| TBR1 nbrhd, dn proximity to SOX2 mean       | Single-cell |
| TBR1 nbrhd, dn proximity to SOX2 stdev      | Single-cell |
| TBR1 nbrhd, dn proximity to TBR1 mean       | Single-cell |
| TBR1 nbrhd, dn proximity to TBR1 stdev      | Single-cell |
| DP nbrhd, sox2 proximity to SOX2 mean       | Single-cell |
| DP nbrhd, sox2 proximity to SOX2 stdev      | Single-cell |
| DP nbrhd, sox2 proximity to TBR1 mean       | Single-cell |
| DP nbrhd, sox2 proximity to TBR1 stdev      | Single-cell |
| DP nbrhd, tbr1 proximity to SOX2 mean       | Single-cell |
| DP nbrhd, tbr1 proximity to SOX2 stdev      | Single-cell |
| DP nbrhd, tbr1 proximity to TBR1 mean       | Single-cell |
| DP nbrhd, tbr1 proximity to TBR1 stdev      | Single-cell |
| DP nbrhd, dn proximity to SOX2 mean         | Single-cell |
| DP nbrhd, dn proximity to SOX2 stdev        | Single-cell |
| DP nbrhd, dn proximity to TBR1 mean         | Single-cell |
| DP nbrhd, dn proximity to TBR1 stdev        | Single-cell |
| MidTBR1 nbrhd, sox2 proximity to SOX2 mean  | Single-cell |
| MidTBR1 nbrhd, sox2 proximity to SOX2 stdev | Single-cell |
| MidTBR1 nbrhd, sox2 proximity to TBR1 mean  | Single-cell |
| MidTBR1 nbrhd, sox2 proximity to TBR1 stdev | Single-cell |
| MidTBR1 nbrhd, tbr1 proximity to SOX2 mean  | Single-cell |
| MidTBR1 nbrhd, tbr1 proximity to SOX2 stdev | Single-cell |
| MidTBR1 nbrhd, tbr1 proximity to TBR1 mean  | Single-cell |

|                                              |                  |
|----------------------------------------------|------------------|
| MidTBR1 nbrhd, tbr1 proximity to TBR1 stdev  | Single-cell      |
| MidTBR1 nbrhd, dn proximity to SOX2 mean     | Single-cell      |
| MidTBR1 nbrhd, dn proximity to SOX2 stdev    | Single-cell      |
| MidTBR1 nbrhd, dn proximity to TBR1 mean     | Single-cell      |
| MidTBR1 nbrhd, dn proximity to TBR1 stdev    | Single-cell      |
| MidSOX2 nbrhd, sox2 proximity to SOX2 mean   | Single-cell      |
| MidSOX2 nbrhd, sox2 proximity to SOX2 stdev  | Single-cell      |
| MidSOX2 nbrhd, sox2 proximity to TBR1 mean   | Single-cell      |
| MidSOX2 nbrhd, sox2 proximity to TBR1 stdev  | Single-cell      |
| MidSOX2 nbrhd, tbr1 proximity to SOX2 mean   | Single-cell      |
| MidSOX2 nbrhd, tbr1 proximity to SOX2 stdev  | Single-cell      |
| MidSOX2 nbrhd, tbr1 proximity to TBR1 mean   | Single-cell      |
| MidSOX2 nbrhd, tbr1 proximity to TBR1 stdev  | Single-cell      |
| MidSOX2 nbrhd, dn proximity to SOX2 mean     | Single-cell      |
| MidSOX2 nbrhd, dn proximity to SOX2 stdev    | Single-cell      |
| MidSOX2 nbrhd, dn proximity to TBR1 mean     | Single-cell      |
| MidSOX2 nbrhd, dn proximity to TBR1 stdev    | Single-cell      |
| MidInter nbrhd, sox2 proximity to SOX2 mean  | Single-cell      |
| MidInter nbrhd, sox2 proximity to SOX2 stdev | Single-cell      |
| MidInter nbrhd, sox2 proximity to TBR1 mean  | Single-cell      |
| MidInter nbrhd, sox2 proximity to TBR1 stdev | Single-cell      |
| MidInter nbrhd, tbr1 proximity to SOX2 mean  | Single-cell      |
| MidInter nbrhd, tbr1 proximity to SOX2 stdev | Single-cell      |
| MidInter nbrhd, tbr1 proximity to TBR1 mean  | Single-cell      |
| MidInter nbrhd, tbr1 proximity to TBR1 stdev | Single-cell      |
| MidInter nbrhd, dn proximity to SOX2 mean    | Single-cell      |
| MidInter nbrhd, dn proximity to SOX2 stdev   | Single-cell      |
| MidInter nbrhd, dn proximity to TBR1 mean    | Single-cell      |
| MidInter nbrhd, dn proximity to TBR1 stdev   | Single-cell      |
| TBR1-LowDN Cytoarchitecture fraction         | Cytoarchitecture |
| TBR1-HighDN Cytoarchitecture fraction        | Cytoarchitecture |
| Surface Cytoarchitecture fraction            | Cytoarchitecture |
| Artifacts Cytoarchitecture fraction          | Cytoarchitecture |
| DN Cytoarchitecture fraction                 | Cytoarchitecture |
| Adjacent Cytoarchitecture fraction           | Cytoarchitecture |
| ave. TBR1-LowDN profile, sox2 count          | Cytoarchitecture |
| ave. TBR1-LowDN profile, tbr1 count          | Cytoarchitecture |
| ave. TBR1-LowDN profile, dn count            | Cytoarchitecture |
| ave. TBR1-HighDN profile, sox2 count         | Cytoarchitecture |
| ave. TBR1-HighDN profile, tbr1 count         | Cytoarchitecture |
| ave. TBR1-HighDN profile, dn count           | Cytoarchitecture |
| ave. Surface profile, sox2 count             | Cytoarchitecture |
| ave. Surface profile, tbr1 count             | Cytoarchitecture |
| ave. Surface profile, dn count               | Cytoarchitecture |
| ave. Artifacts profile, sox2 count           | Cytoarchitecture |
| ave. Artifacts profile, tbr1 count           | Cytoarchitecture |
| ave. Artifacts profile, dn count             | Cytoarchitecture |
| ave. DN profile, sox2 count                  | Cytoarchitecture |
| ave. DN profile, tbr1 count                  | Cytoarchitecture |
| ave. DN profile, dn count                    | Cytoarchitecture |
| ave. Adjacent profile, sox2 count            | Cytoarchitecture |
| ave. Adjacent profile, tbr1 count            | Cytoarchitecture |
| ave. Adjacent profile, dn count              | Cytoarchitecture |
| ave. TBR1-LowDN profile, sox2 mean position  | Cytoarchitecture |
| ave. TBR1-LowDN profile, tbr1 mean position  | Cytoarchitecture |
| ave. TBR1-LowDN profile, dn mean position    | Cytoarchitecture |
| ave. TBR1-HighDN profile, sox2 mean position | Cytoarchitecture |
| ave. TBR1-HighDN profile, tbr1 mean position | Cytoarchitecture |
| ave. TBR1-HighDN profile, dn mean position   | Cytoarchitecture |
| ave. Surface profile, sox2 mean position     | Cytoarchitecture |
| ave. Surface profile, tbr1 mean position     | Cytoarchitecture |
| ave. Surface profile, dn mean position       | Cytoarchitecture |
| ave. Artifacts profile, sox2 mean position   | Cytoarchitecture |
| ave. Artifacts profile, tbr1 mean position   | Cytoarchitecture |
| ave. Artifacts profile, dn mean position     | Cytoarchitecture |

|                                                |                  |
|------------------------------------------------|------------------|
| ave. DN profile, sox2 mean position            | Cytoarchitecture |
| ave. DN profile, tbr1 mean position            | Cytoarchitecture |
| ave. DN profile, dn mean position              | Cytoarchitecture |
| ave. Adjacent profile, sox2 mean position      | Cytoarchitecture |
| ave. Adjacent profile, tbr1 mean position      | Cytoarchitecture |
| ave. Adjacent profile, dn mean position        | Cytoarchitecture |
| ave. TBR1-LowDN profile, sox2 profile stdev    | Cytoarchitecture |
| ave. TBR1-LowDN profile, tbr1 profile stdev    | Cytoarchitecture |
| ave. TBR1-LowDN profile, dn profile stdev      | Cytoarchitecture |
| ave. TBR1-HighDN profile, sox2 profile stdev   | Cytoarchitecture |
| ave. TBR1-HighDN profile, tbr1 profile stdev   | Cytoarchitecture |
| ave. TBR1-HighDN profile, dn profile stdev     | Cytoarchitecture |
| ave. Surface profile, sox2 profile stdev       | Cytoarchitecture |
| ave. Surface profile, tbr1 profile stdev       | Cytoarchitecture |
| ave. Surface profile, dn profile stdev         | Cytoarchitecture |
| ave. Artifacts profile, sox2 profile stdev     | Cytoarchitecture |
| ave. Artifacts profile, tbr1 profile stdev     | Cytoarchitecture |
| ave. Artifacts profile, dn profile stdev       | Cytoarchitecture |
| ave. DN profile, sox2 profile stdev            | Cytoarchitecture |
| ave. DN profile, tbr1 profile stdev            | Cytoarchitecture |
| ave. DN profile, dn profile stdev              | Cytoarchitecture |
| ave. Adjacent profile, sox2 profile stdev      | Cytoarchitecture |
| ave. Adjacent profile, tbr1 profile stdev      | Cytoarchitecture |
| ave. Adjacent profile, dn profile stdev        | Cytoarchitecture |
| organoid volume (mm3)                          | Whole-organoid   |
| organoid equivalent diameter (mm)              | Whole-organoid   |
| organoid major axis (mm)                       | Whole-organoid   |
| organoid minor axis (mm)                       | Whole-organoid   |
| organoid axis ratio                            | Whole-organoid   |
| ventricle count                                | Whole-organoid   |
| ventricle volume mean (um3)                    | Whole-organoid   |
| ventricle volume stdev (um3)                   | Whole-organoid   |
| ventricle equivalent diameter mean (um)        | Whole-organoid   |
| ventricle equivalent diameter stdev (um)       | Whole-organoid   |
| ventricle major axis mean (um)                 | Whole-organoid   |
| ventricle major axis stdev (um)                | Whole-organoid   |
| ventricle minor axis mean (um)                 | Whole-organoid   |
| ventricle minor axis stdev (um)                | Whole-organoid   |
| ventricle axis ratio mean                      | Whole-organoid   |
| ventricle axis ratio stdev                     | Whole-organoid   |
| DN nbrhd, sox2 surface distance mean (um)      | Whole-organoid   |
| DN nbrhd, sox2 surface distance stdev (um)     | Whole-organoid   |
| DN nbrhd, tbr1 surface distance mean (um)      | Whole-organoid   |
| DN nbrhd, tbr1 surface distance stdev (um)     | Whole-organoid   |
| DN nbrhd, dn surface distance mean (um)        | Whole-organoid   |
| DN nbrhd, dn surface distance stdev (um)       | Whole-organoid   |
| SOX2 nbrhd, sox2 surface distance mean (um)    | Whole-organoid   |
| SOX2 nbrhd, sox2 surface distance stdev (um)   | Whole-organoid   |
| SOX2 nbrhd, tbr1 surface distance mean (um)    | Whole-organoid   |
| SOX2 nbrhd, tbr1 surface distance stdev (um)   | Whole-organoid   |
| SOX2 nbrhd, dn surface distance mean (um)      | Whole-organoid   |
| SOX2 nbrhd, dn surface distance stdev (um)     | Whole-organoid   |
| TBR1 nbrhd, sox2 surface distance mean (um)    | Whole-organoid   |
| TBR1 nbrhd, sox2 surface distance stdev (um)   | Whole-organoid   |
| TBR1 nbrhd, tbr1 surface distance mean (um)    | Whole-organoid   |
| TBR1 nbrhd, tbr1 surface distance stdev (um)   | Whole-organoid   |
| TBR1 nbrhd, dn surface distance mean (um)      | Whole-organoid   |
| TBR1 nbrhd, dn surface distance stdev (um)     | Whole-organoid   |
| DP nbrhd, sox2 surface distance mean (um)      | Whole-organoid   |
| DP nbrhd, sox2 surface distance stdev (um)     | Whole-organoid   |
| DP nbrhd, tbr1 surface distance mean (um)      | Whole-organoid   |
| DP nbrhd, tbr1 surface distance stdev (um)     | Whole-organoid   |
| DP nbrhd, dn surface distance mean (um)        | Whole-organoid   |
| DP nbrhd, dn surface distance stdev (um)       | Whole-organoid   |
| MidTBR1 nbrhd, sox2 surface distance mean (um) | Whole-organoid   |

|                                                  |                |
|--------------------------------------------------|----------------|
| MidTBR1 nbrhd, sox2 surface distance stdev (um)  | Whole-organoid |
| MidTBR1 nbrhd, tbr1 surface distance mean (um)   | Whole-organoid |
| MidTBR1 nbrhd, tbr1 surface distance stdev (um)  | Whole-organoid |
| MidTBR1 nbrhd, dn surface distance mean (um)     | Whole-organoid |
| MidTBR1 nbrhd, dn surface distance stdev (um)    | Whole-organoid |
| MidSOX2 nbrhd, sox2 surface distance mean (um)   | Whole-organoid |
| MidSOX2 nbrhd, sox2 surface distance stdev (um)  | Whole-organoid |
| MidSOX2 nbrhd, tbr1 surface distance mean (um)   | Whole-organoid |
| MidSOX2 nbrhd, tbr1 surface distance stdev (um)  | Whole-organoid |
| MidSOX2 nbrhd, dn surface distance mean (um)     | Whole-organoid |
| MidSOX2 nbrhd, dn surface distance stdev (um)    | Whole-organoid |
| MidInter nbrhd, sox2 surface distance mean (um)  | Whole-organoid |
| MidInter nbrhd, tbr1 surface distance mean (um)  | Whole-organoid |
| MidInter nbrhd, tbr1 surface distance stdev (um) | Whole-organoid |
| MidInter nbrhd, dn surface distance mean (um)    | Whole-organoid |
| MidInter nbrhd, dn surface distance stdev (um)   | Whole-organoid |
| MidInter nbrhd, dn surface distance stdev (um)   | Whole-organoid |
